# Supplementary material for: New 2,5-diaryl-1,3,4-oxadiazole–fluorene hybrids as electron transporting materials for blended-layer organic light emitting diodes
Source: Royal Society of Chemistry journal article supplement (doi:10.1039/b413066a), 2004-11-24
Supplement: b413066a.pdf [file b413066a.pdf]

---

## New 2,5-diaryl-1,3,4-oxadiazole–fluorene hybrids as electron transporting materials for blended-layer organic light emitting diodes

---

Stephen Oyston,<sup>a</sup> Changsheng Wang,<sup>a</sup> Gregory Hughes,<sup>a</sup> Andrei S. Batsanov,<sup>a</sup> Igor F. Perepichka,<sup>a</sup> Martin R. Bryce,<sup>\*a</sup> Jin H. Ahn,<sup>b</sup> Christopher Pearson<sup>b</sup> and Michael C. Petty<sup>\*,b</sup>

<sup>a</sup> Department of Chemistry and Centre for Molecular and Nanoscale Electronics, University of Durham, Durham, UK DH1 3LE. E-mail [m.r.bryce@durham.ac.uk](mailto:m.r.bryce@durham.ac.uk)

<sup>b</sup> School of Engineering and Centre for Molecular and Nanoscale Electronics, University of Durham, Durham, UK DH1 3LE. E-mail [m.c.petty@durham.ac.uk](mailto:m.c.petty@durham.ac.uk)

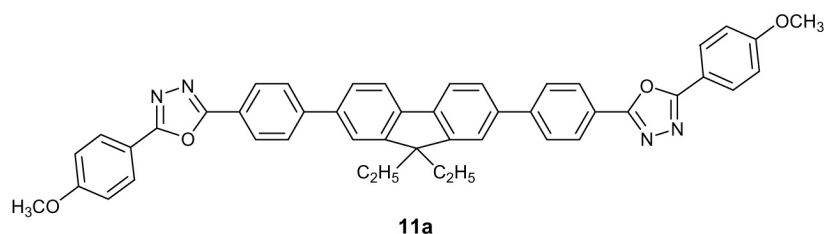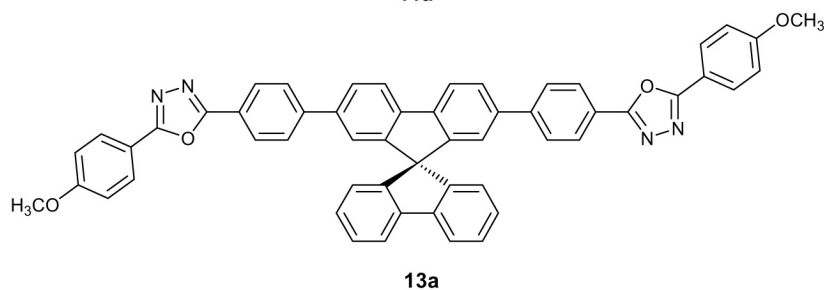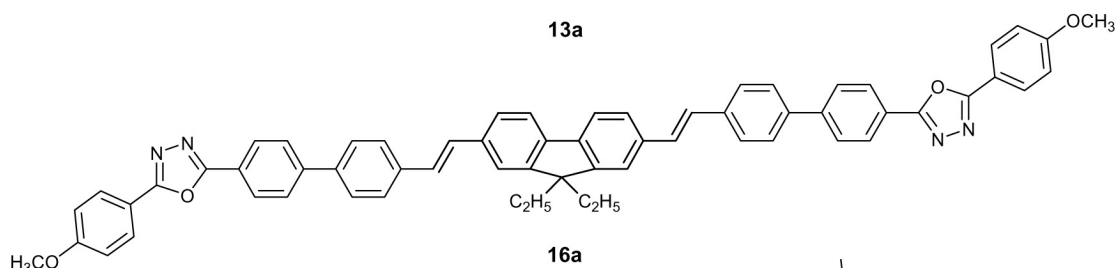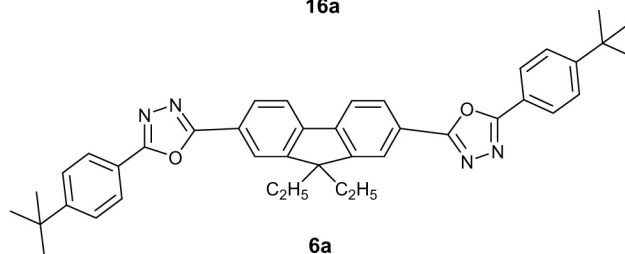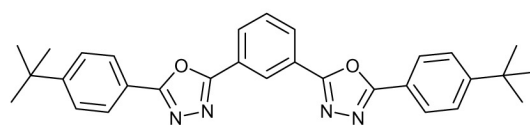

OXD-7

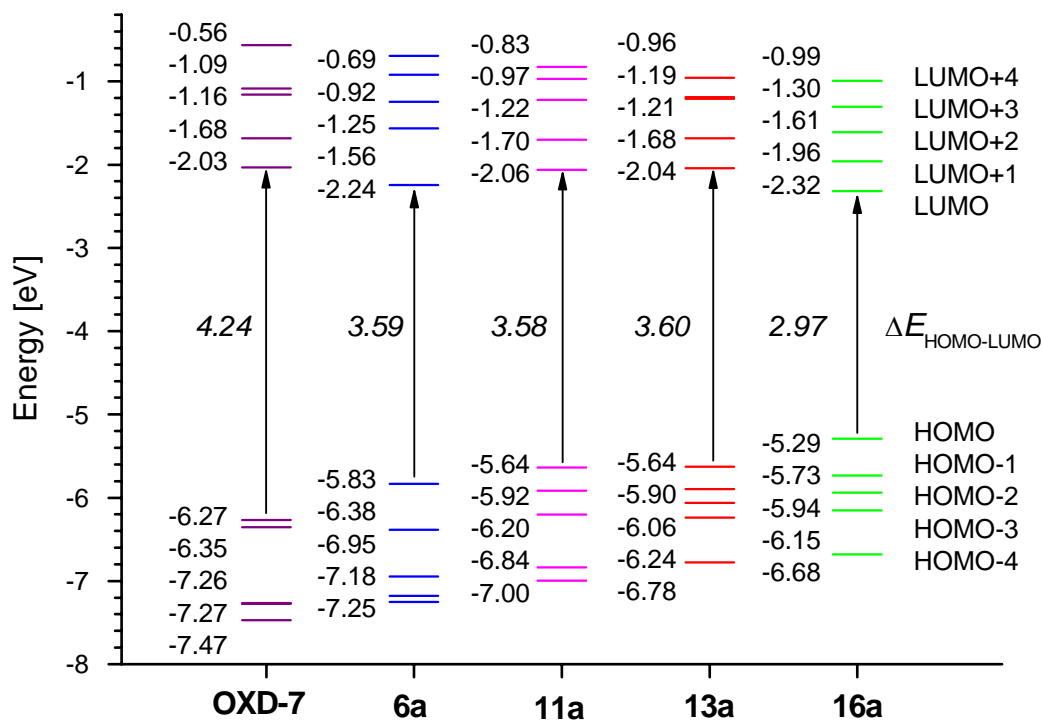

**Figure S1.** B3LYP/6-311G(2d,p)//B3LYP/6-31G(d) orbital energy level diagrams for compounds OXD-7, 6a, 11a, 13a and 16a.

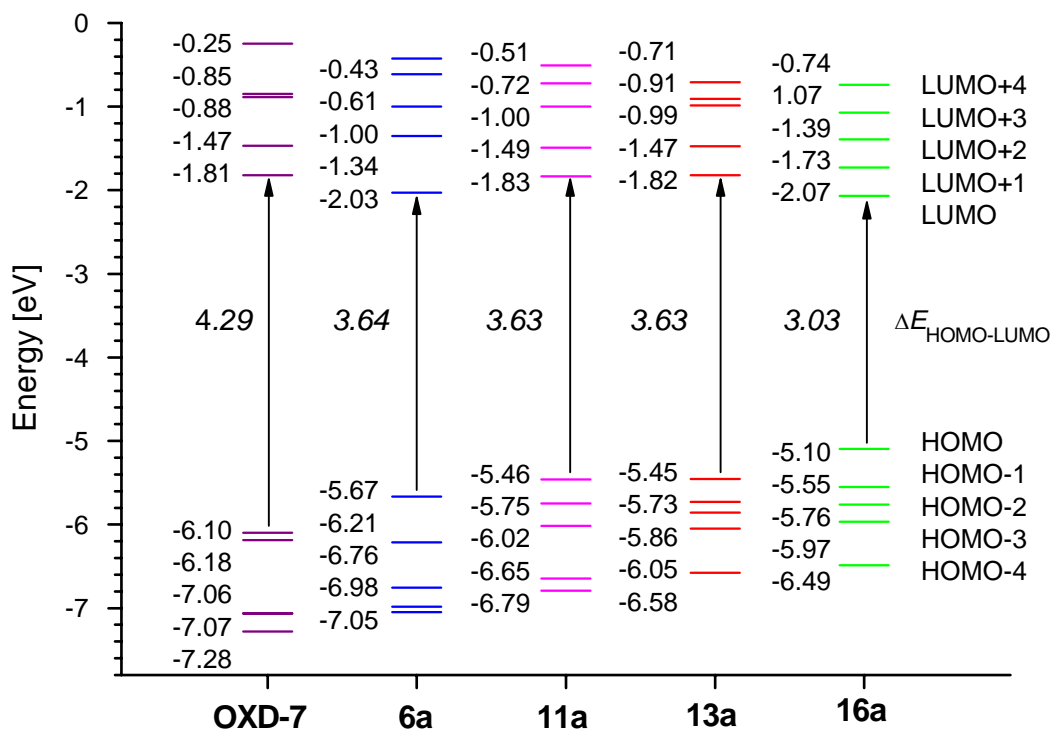

**Figure S2.** B3LYP/6-31G(d) orbital energy level diagrams for compounds OXD-7, 6a, 11a, 13a and 16a.

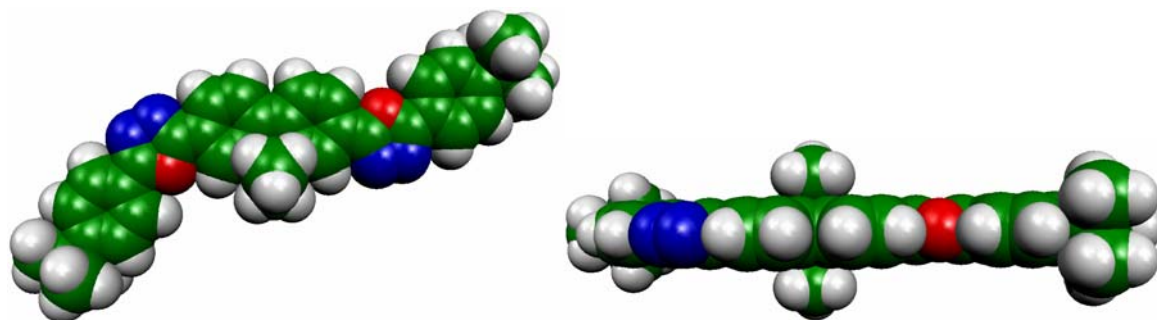

**Figure S3.** B3LYP/6-31G(d) optimized geometry of compound **6a**.

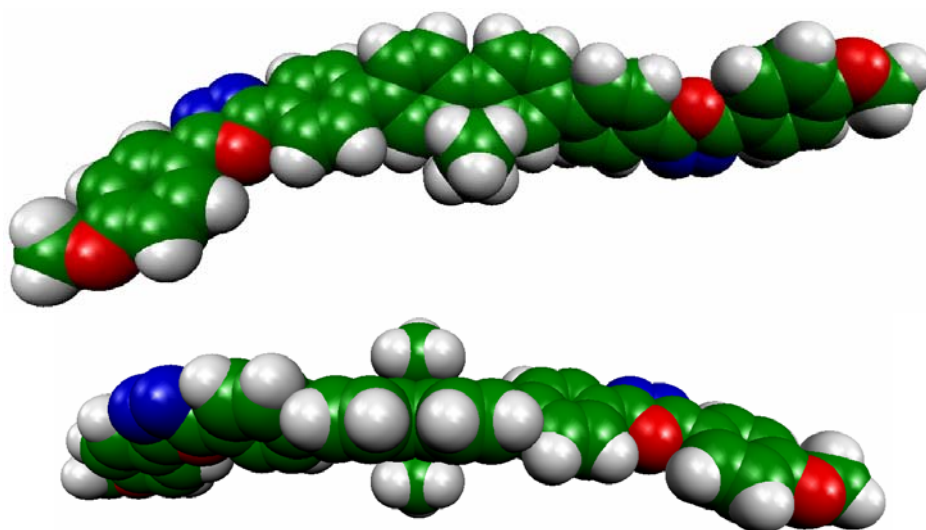

**Figure S4.** B3LYP/6-31G(d) optimized geometry of compound **11a**.

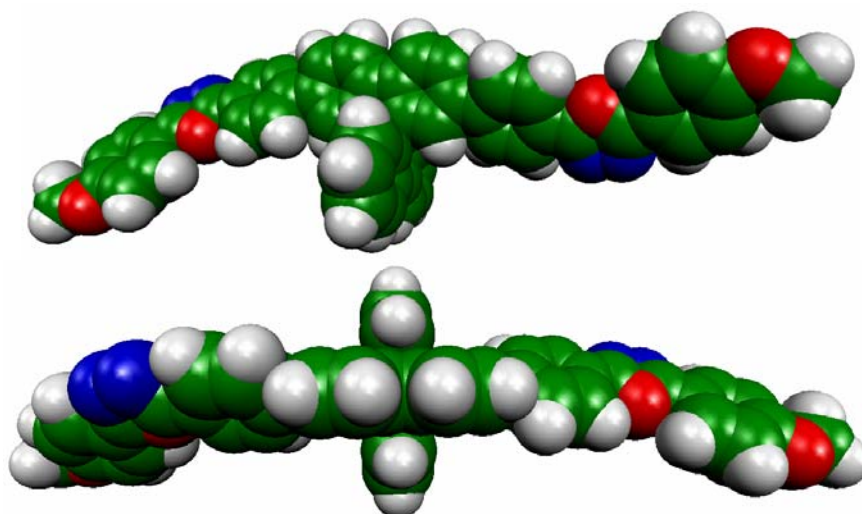

**Figure S5.** B3LYP/6-31G(d) optimized geometry of compound **13a**.

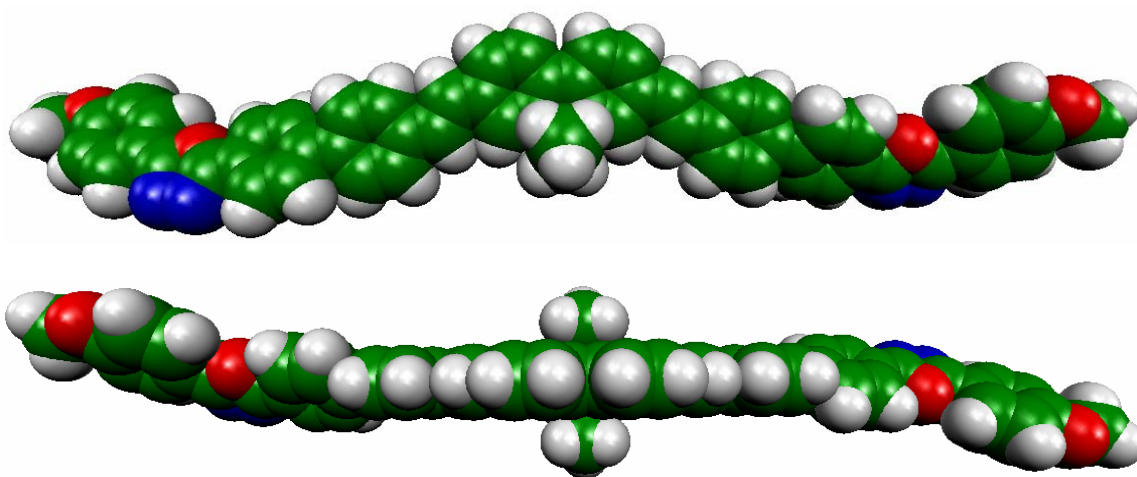

**Figure S6.** B3LYP/6-31G(d) optimized geometry of compound **16a**.

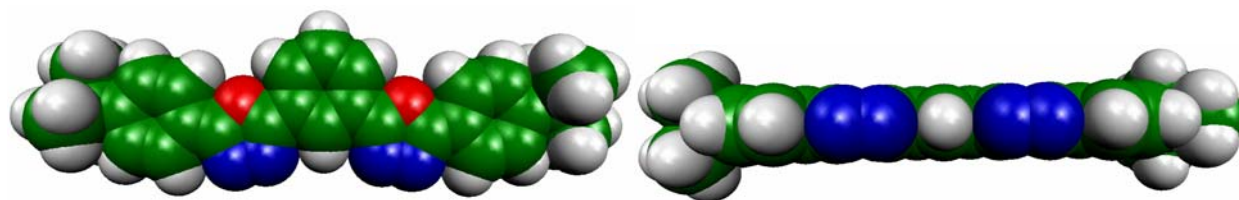

**Figure S7.** B3LYP/6-31G(d) optimized geometry of compound **OXD-7**.

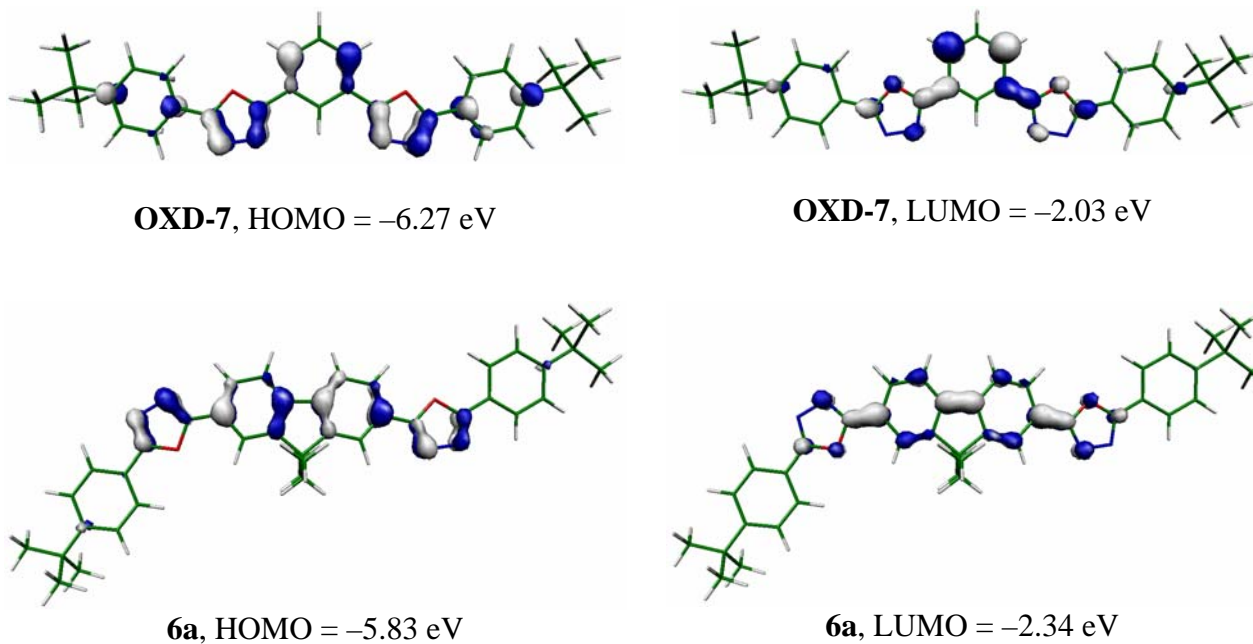

**Figure S8.** Frontier orbitals of compounds **OXD-7** and **6a** calculated by B3LYP/6-311G(2d,p)//B3LYP6031G(d) DFT method.

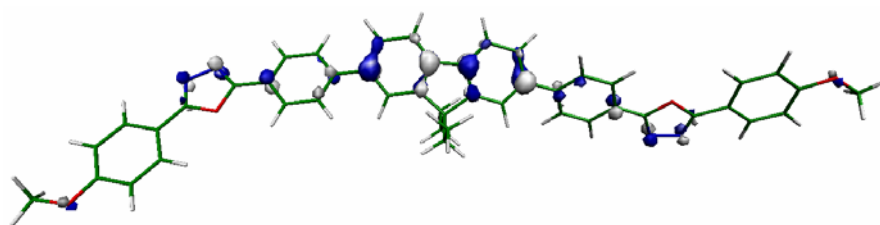

**11a**, HOMO = - 5.64 eV

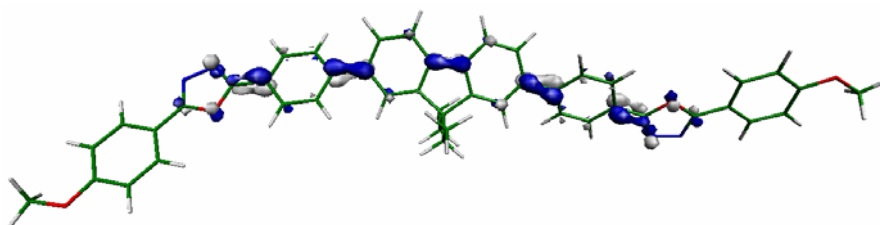

**11a**, LUMO = - 2.06 eV

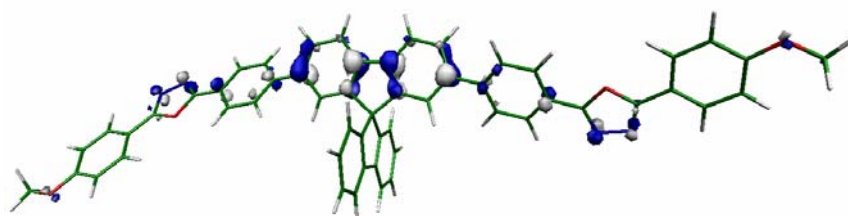

**13a**, HOMO = - 5.64 eV

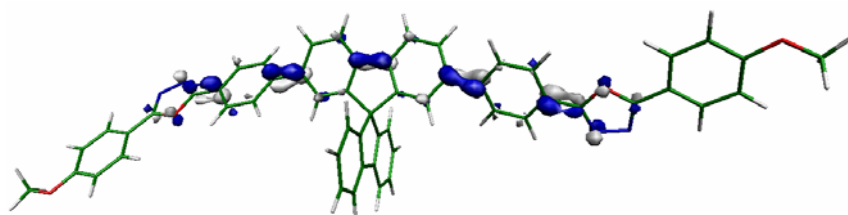

**13a**, LUMO = - 2.04 eV

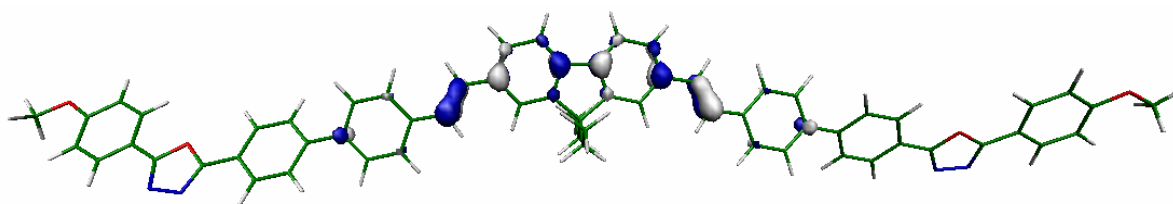

**16a**, HOMO = -5.29 eV

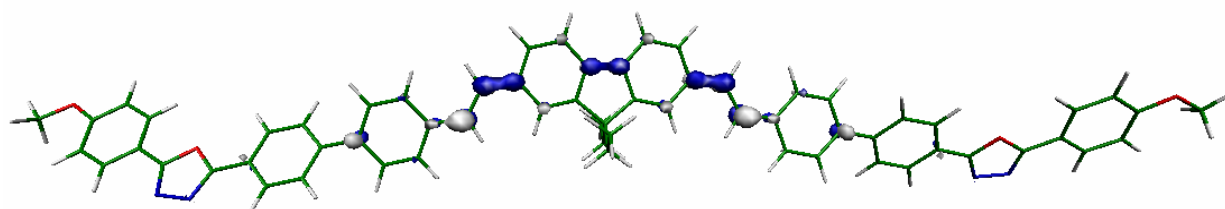

**16a**, LUMO = -2.32 eV

**Figure S9.** Frontier orbitals of compounds **11a**, **13a** and **16a** calculated by B3LYP/6-311G(2d,p)//B3LYP/6-311G(d) DFT method.

**Table S1.** B3LYP/6-31G(d) optimised geometry of compound **6a**.

E(RB+HF-LYP) = -1957.1475651 Hartree

Dipole moment (Debye): X= 1.2814 Y= -0.7816 Z= -0.0001 Tot= 1.5010

| Center<br>Number | Atomic<br>Number | Atomic<br>Type | Coordinates (Angstroms) |           |           |
|------------------|------------------|----------------|-------------------------|-----------|-----------|
|                  |                  |                | X                       | Y         | Z         |
| 1                | 6                | 0              | -3.341225               | 1.974013  | -0.000082 |
| 2                | 6                | 0              | -2.778116               | 0.683572  | -0.000045 |
| 3                | 6                | 0              | -1.398018               | 0.546300  | -0.000051 |
| 4                | 6                | 0              | -0.569230               | 1.687797  | -0.000098 |
| 5                | 6                | 0              | -1.125867               | 2.971307  | -0.000139 |
| 6                | 6                | 0              | -2.508907               | 3.110208  | -0.000130 |
| 7                | 6                | 0              | 0.826813                | 1.247609  | -0.000086 |
| 8                | 6                | 0              | 0.850425                | -0.164609 | -0.000029 |
| 9                | 6                | 0              | 2.056040                | -0.845199 | -0.000001 |
| 10               | 6                | 0              | 3.260029                | -0.111740 | -0.000029 |
| 11               | 6                | 0              | 3.231534                | 1.294285  | -0.000088 |
| 12               | 6                | 0              | 2.018051                | 1.977531  | -0.000116 |
| 13               | 6                | 0              | -0.566482               | -0.735616 | -0.000003 |
| 14               | 6                | 0              | -0.839800               | -1.607751 | -1.261388 |
| 15               | 6                | 0              | -0.628863               | -0.919959 | -2.613648 |
| 16               | 6                | 0              | -0.839794               | -1.607650 | 1.261453  |
| 17               | 6                | 0              | -0.628856               | -0.919748 | 2.613657  |
| 18               | 6                | 0              | -4.784148               | 2.162201  | -0.000060 |
| 19               | 6                | 0              | 4.521697                | -0.836526 | 0.000007  |
| 20               | 7                | 0              | -5.458250               | 3.277796  | -0.000026 |
| 21               | 7                | 0              | -6.801061               | 2.934702  | -0.000001 |
| 22               | 6                | 0              | -6.857416               | 1.632601  | -0.000025 |
| 23               | 8                | 0              | -5.609720               | 1.071132  | -0.000061 |
| 24               | 7                | 0              | 4.715259                | -2.125571 | 0.000067  |
| 25               | 7                | 0              | 6.086962                | -2.324871 | 0.000085  |
| 26               | 6                | 0              | 6.639108                | -1.144288 | 0.000035  |
| 27               | 8                | 0              | 5.702807                | -0.146559 | -0.000019 |
| 28               | 6                | 0              | -8.033136               | 0.774906  | -0.000009 |
| 29               | 6                | 0              | 8.054036                | -0.803769 | 0.000034  |
| 30               | 6                | 0              | -7.923779               | -0.623998 | -0.000132 |
| 31               | 6                | 0              | -9.067194               | -1.413972 | -0.000113 |
| 32               | 6                | 0              | -10.357173              | -0.853849 | 0.000032  |
| 33               | 6                | 0              | -10.446004              | 0.547114  | 0.000153  |
| 34               | 6                | 0              | -9.310334               | 1.352190  | 0.000132  |
| 35               | 6                | 0              | 8.489818                | 0.530067  | -0.000028 |
| 36               | 6                | 0              | 9.848957                | 0.820697  | -0.000023 |
| 37               | 6                | 0              | 10.825015               | -0.191881 | 0.000042  |
| 38               | 6                | 0              | 10.369388               | -1.519564 | 0.000100  |
| 39               | 6                | 0              | 9.011717                | -1.827062 | 0.000097  |
| 40               | 6                | 0              | -11.593107              | -1.770219 | 0.000055  |
| 41               | 6                | 0              | 12.318319               | 0.179589  | 0.000043  |
| 42               | 6                | 0              | 12.638936               | 1.015317  | 1.262710  |
| 43               | 6                | 0              | 13.231384               | -1.061027 | 0.000074  |
| 44               | 6                | 0              | 12.638944               | 1.015266  | -1.262656 |
| 45               | 6                | 0              | -11.568502              | -2.665221 | 1.262538  |
| 46               | 6                | 0              | -12.912637              | -0.975302 | 0.000243  |
| 47               | 6                | 0              | -11.568720              | -2.664991 | -1.262595 |
| 48               | 1                | 0              | -3.429178               | -0.185356 | -0.000007 |
| 49               | 1                | 0              | -0.492760               | 3.854438  | -0.000175 |
| 50               | 1                | 0              | -2.968819               | 4.092730  | -0.000157 |
| 51               | 1                | 0              | 2.103677                | -1.929980 | 0.000045  |
| 52               | 1                | 0              | 4.165527                | 1.846297  | -0.000110 |
| 53               | 1                | 0              | 2.007811                | 3.064090  | -0.000160 |
| 54               | 1                | 0              | -0.196933               | -2.496004 | -1.199751 |
| 55               | 1                | 0              | -1.872758               | -1.975956 | -1.196779 |

ESI: S. Oyston *et al.* «New 2,5-Diaryl-1,3,4-oxadiazole-fluorene...»

|    |   |   |            |           |           |
|----|---|---|------------|-----------|-----------|
| 56 | 1 | 0 | -0.841651  | -1.618943 | -3.430060 |
| 57 | 1 | 0 | -1.290428  | -0.055616 | -2.733654 |
| 58 | 1 | 0 | 0.403256   | -0.574169 | -2.732319 |
| 59 | 1 | 0 | -1.872750  | -1.975864 | 1.196877  |
| 60 | 1 | 0 | -0.196924  | -2.495906 | 1.199887  |
| 61 | 1 | 0 | -0.841633  | -1.618668 | 3.430126  |
| 62 | 1 | 0 | 0.403260   | -0.573938 | 2.732294  |
| 63 | 1 | 0 | -1.290430  | -0.055401 | 2.733597  |
| 64 | 1 | 0 | -6.943232  | -1.089279 | -0.000245 |
| 65 | 1 | 0 | -8.947130  | -2.493484 | -0.000212 |
| 66 | 1 | 0 | -11.415619 | 1.031676  | 0.000268  |
| 67 | 1 | 0 | -9.401233  | 2.433587  | 0.000227  |
| 68 | 1 | 0 | 7.762889   | 1.336022  | -0.000078 |
| 69 | 1 | 0 | 10.152743  | 1.863562  | -0.000074 |
| 70 | 1 | 0 | 11.078564  | -2.339181 | 0.000152  |
| 71 | 1 | 0 | 8.680619   | -2.860540 | 0.000144  |
| 72 | 1 | 0 | 13.699364  | 1.295046  | 1.273543  |
| 73 | 1 | 0 | 12.051041  | 1.938163  | 1.302300  |
| 74 | 1 | 0 | 12.428523  | 0.445112  | 2.174624  |
| 75 | 1 | 0 | 14.280544  | -0.745462 | 0.000097  |
| 76 | 1 | 0 | 13.074059  | -1.683398 | 0.888171  |
| 77 | 1 | 0 | 13.074105  | -1.683411 | -0.888023 |
| 78 | 1 | 0 | 13.699366  | 1.295020  | -1.273479 |
| 79 | 1 | 0 | 12.428564  | 0.445013  | -2.174548 |
| 80 | 1 | 0 | 12.051026  | 1.938095  | -1.302299 |
| 81 | 1 | 0 | -12.441316 | -3.329187 | 1.273729  |
| 82 | 1 | 0 | -10.672564 | -3.293544 | 1.301194  |
| 83 | 1 | 0 | -11.591311 | -2.058201 | 2.174616  |
| 84 | 1 | 0 | -13.759999 | -1.669846 | 0.000242  |
| 85 | 1 | 0 | -13.007297 | -0.340188 | 0.888317  |
| 86 | 1 | 0 | -13.007442 | -0.340011 | -0.887689 |
| 87 | 1 | 0 | -12.441530 | -3.328965 | -1.273749 |
| 88 | 1 | 0 | -11.591700 | -2.057806 | -2.174559 |
| 89 | 1 | 0 | -10.672783 | -3.293296 | -1.301525 |

---

**Table S2.** B3LYP/6-31G(d) optimised geometry of compound **11a**.

E(RB+HF-LYP) = -2333.7994071 Hartree

Dipole moment (Debye): X= 0.8701 Y= 2.1239 Z= -2.8745 Tot= 3.6784

| Center<br>Number | Atomic<br>Number | Atomic<br>Type | Coordinates (Angstroms) |           |           |
|------------------|------------------|----------------|-------------------------|-----------|-----------|
|                  |                  |                | X                       | Y         | Z         |
| 1                | 6                | 0              | 3.448829                | -0.913622 | 0.196578  |
| 2                | 6                | 0              | 2.383766                | -0.092332 | 0.621368  |
| 3                | 6                | 0              | 1.070738                | -0.492765 | 0.420192  |
| 4                | 6                | 0              | 0.788805                | -1.722269 | -0.209339 |
| 5                | 6                | 0              | 1.831418                | -2.548623 | -0.633350 |
| 6                | 6                | 0              | 3.147326                | -2.139636 | -0.427975 |
| 7                | 6                | 0              | -0.665080               | -1.880737 | -0.291489 |
| 8                | 6                | 0              | -1.272662               | -0.744616 | 0.280843  |
| 9                | 6                | 0              | -2.655158               | -0.640012 | 0.332719  |
| 10               | 6                | 0              | -3.464622               | -1.671330 | -0.187128 |
| 11               | 6                | 0              | -2.839439               | -2.799257 | -0.753629 |
| 12               | 6                | 0              | -1.451801               | -2.911100 | -0.810249 |
| 13               | 6                | 0              | -0.219204               | 0.239550  | 0.790376  |
| 14               | 6                | 0              | -0.327180               | 1.623432  | 0.085115  |
| 15               | 6                | 0              | -0.231994               | 1.607880  | -1.443660 |
| 16               | 6                | 0              | -0.334003               | 0.468474  | 2.326550  |
| 17               | 6                | 0              | -0.254917               | -0.787654 | 3.199416  |
| 18               | 6                | 0              | 4.856044                | -0.495683 | 0.401932  |
| 19               | 6                | 0              | -4.942801               | -1.569879 | -0.142937 |
| 20               | 6                | 0              | 5.848693                | -0.792781 | -0.548914 |
| 21               | 6                | 0              | 7.169751                | -0.403153 | -0.360632 |
| 22               | 6                | 0              | 7.541349                | 0.304447  | 0.792629  |
| 23               | 6                | 0              | 6.560131                | 0.609935  | 1.750735  |
| 24               | 6                | 0              | 5.244342                | 0.214163  | 1.554568  |
| 25               | 6                | 0              | -5.744348               | -2.705706 | 0.082507  |
| 26               | 6                | 0              | -7.128848               | -2.617058 | 0.118611  |
| 27               | 6                | 0              | -7.763974               | -1.377929 | -0.069774 |
| 28               | 6                | 0              | -6.978471               | -0.236752 | -0.291957 |
| 29               | 6                | 0              | -5.592177               | -0.336380 | -0.327730 |
| 30               | 6                | 0              | 8.915693                | 0.725751  | 1.016373  |
| 31               | 6                | 0              | -9.216628               | -1.307732 | -0.034075 |
| 32               | 7                | 0              | 9.408865                | 1.389578  | 2.022658  |
| 33               | 7                | 0              | 10.765036               | 1.544263  | 1.775520  |
| 34               | 6                | 0              | 11.007768               | 0.963622  | 0.633637  |
| 35               | 8                | 0              | 9.876238                | 0.419502  | 0.090386  |
| 36               | 7                | 0              | -10.071713              | -2.274556 | 0.140650  |
| 37               | 7                | 0              | -11.335878              | -1.706417 | 0.090478  |
| 38               | 6                | 0              | -11.166637              | -0.429682 | -0.112799 |
| 39               | 8                | 0              | -9.841505               | -0.101264 | -0.202101 |
| 40               | 6                | 0              | 12.272268               | 0.841203  | -0.072763 |
| 41               | 6                | 0              | -12.174856              | 0.608825  | -0.246282 |
| 42               | 6                | 0              | 12.364891               | 0.173385  | -1.307499 |
| 43               | 6                | 0              | 13.582506               | 0.067374  | -1.960239 |
| 44               | 6                | 0              | 14.739835               | 0.626966  | -1.394831 |
| 45               | 6                | 0              | 14.658051               | 1.295601  | -0.164390 |
| 46               | 6                | 0              | 13.431630               | 1.398067  | 0.485502  |
| 47               | 6                | 0              | -11.824860              | 1.957096  | -0.443122 |
| 48               | 6                | 0              | -12.806218              | 2.927477  | -0.567461 |
| 49               | 6                | 0              | -14.163758              | 2.574463  | -0.498308 |
| 50               | 6                | 0              | -14.523144              | 1.232816  | -0.301738 |
| 51               | 6                | 0              | -13.532113              | 0.263762  | -0.177718 |
| 52               | 8                | 0              | 15.883124               | 0.466948  | -2.114065 |
| 53               | 8                | 0              | -15.046952              | 3.600067  | -0.632670 |
| 54               | 6                | 0              | -16.436837              | 3.310418  | -0.571734 |
| 55               | 6                | 0              | 17.090920               | 1.008731  | -1.597282 |



ESI: S. Oyston *et al.* «New 2,5-Diaryl-1,3,4-oxadiazole-fluorene...»

|    |   |   |            |           |           |
|----|---|---|------------|-----------|-----------|
| 56 | 1 | 0 | 2.601176   | 0.868305  | 1.081693  |
| 57 | 1 | 0 | 1.628771   | -3.504283 | -1.110068 |
| 58 | 1 | 0 | 3.959870   | -2.793688 | -0.730597 |
| 59 | 1 | 0 | -3.124767  | 0.222739  | 0.798548  |
| 60 | 1 | 0 | -3.453574  | -3.585904 | -1.182127 |
| 61 | 1 | 0 | -0.996518  | -3.788686 | -1.262047 |
| 62 | 1 | 0 | -1.279364  | 2.080545  | 0.387189  |
| 63 | 1 | 0 | 0.461292   | 2.271014  | 0.492152  |
| 64 | 1 | 0 | -0.318822  | 2.626096  | -1.839236 |
| 65 | 1 | 0 | 0.725855   | 1.199044  | -1.781716 |
| 66 | 1 | 0 | -1.030848  | 1.006362  | -1.890032 |
| 67 | 1 | 0 | 0.458990   | 1.169117  | 2.621646  |
| 68 | 1 | 0 | -1.283065  | 0.987172  | 2.519142  |
| 69 | 1 | 0 | -0.349355  | -0.520431 | 4.257869  |
| 70 | 1 | 0 | -1.057310  | -1.493010 | 2.959686  |
| 71 | 1 | 0 | 0.700151   | -1.307394 | 3.069698  |
| 72 | 1 | 0 | 5.575682   | -1.313408 | -1.462003 |
| 73 | 1 | 0 | 7.915864   | -0.637177 | -1.113104 |
| 74 | 1 | 0 | 6.849079   | 1.148523  | 2.647304  |
| 75 | 1 | 0 | 4.506061   | 0.434017  | 2.320018  |
| 76 | 1 | 0 | -5.270720  | -3.667051 | 0.257904  |
| 77 | 1 | 0 | -7.735936  | -3.497738 | 0.300822  |
| 78 | 1 | 0 | -7.456989  | 0.724652  | -0.448249 |
| 79 | 1 | 0 | -5.002533  | 0.552705  | -0.530964 |
| 80 | 1 | 0 | 11.476079  | -0.262427 | -1.751953 |
| 81 | 1 | 0 | 13.667391  | -0.445531 | -2.912814 |
| 82 | 1 | 0 | 15.537324  | 1.735444  | 0.291415  |
| 83 | 1 | 0 | 13.361389  | 1.913387  | 1.437886  |
| 84 | 1 | 0 | -10.778522 | 2.239519  | -0.497540 |
| 85 | 1 | 0 | -12.549518 | 3.970852  | -0.719609 |
| 86 | 1 | 0 | -15.563863 | 0.936053  | -0.244821 |
| 87 | 1 | 0 | -13.803053 | -0.775941 | -0.025783 |
| 88 | 1 | 0 | -16.945776 | 4.266820  | -0.701931 |
| 89 | 1 | 0 | -16.740071 | 2.625119  | -1.373564 |
| 90 | 1 | 0 | -16.715358 | 2.879536  | 0.398490  |
| 91 | 1 | 0 | 17.863088  | 0.764572  | -2.328603 |
| 92 | 1 | 0 | 17.027317  | 2.098728  | -1.485963 |
| 93 | 1 | 0 | 17.351062  | 0.559747  | -0.630186 |

---

**Table S3.** B3LYP/6-31G(d) optimised geometry of compound **13a**.

E(RB+HF-LYP) = -2637.4530028 Hartree

Dipole moment (Debye): X= 0.9149 Y= 1.4455 Z= -3.2690 Tot= 3.6896

| Center<br>Number | Atomic<br>Number | Atomic<br>Type | Coordinates (Angstroms) |           |           |
|------------------|------------------|----------------|-------------------------|-----------|-----------|
|                  |                  |                | X                       | Y         | Z         |
| 1                | 6                | 0              | -3.400831               | -2.065711 | -0.011190 |
| 2                | 6                | 0              | -2.775928               | -3.288373 | -0.328439 |
| 3                | 6                | 0              | -1.388655               | -3.412145 | -0.362197 |
| 4                | 6                | 0              | -0.599742               | -2.296343 | -0.073713 |
| 5                | 6                | 0              | -1.211960               | -1.069015 | 0.245500  |
| 6                | 6                | 0              | -2.592364               | -0.948645 | 0.277954  |
| 7                | 6                | 0              | 0.854752                | -2.121704 | -0.028276 |
| 8                | 6                | 0              | 1.901588                | -3.014950 | -0.267020 |
| 9                | 6                | 0              | 3.215388                | -2.566264 | -0.149647 |
| 10               | 6                | 0              | 3.512383                | -1.234902 | 0.204283  |
| 11               | 6                | 0              | 2.446318                | -0.345190 | 0.442603  |
| 12               | 6                | 0              | 1.138383                | -0.788760 | 0.326025  |
| 13               | 6                | 0              | -0.367868               | 0.795480  | 4.315942  |
| 14               | 6                | 0              | -0.527157               | 2.182449  | 4.220540  |
| 15               | 6                | 0              | -0.562353               | 2.810778  | 2.973778  |
| 16               | 6                | 0              | -0.436013               | 2.031500  | 1.821874  |
| 17               | 6                | 0              | -0.275851               | 0.636381  | 1.921850  |
| 18               | 6                | 0              | -0.240917               | 0.012709  | 3.163177  |
| 19               | 6                | 0              | -0.435114               | 2.404416  | 0.400336  |
| 20               | 6                | 0              | -0.561696               | 3.648566  | -0.221036 |
| 21               | 6                | 0              | -0.525560               | 3.712870  | -1.615666 |
| 22               | 6                | 0              | -0.365691               | 2.551317  | -2.379456 |
| 23               | 6                | 0              | -0.238817               | 1.303604  | -1.759046 |
| 24               | 6                | 0              | -0.273921               | 1.237979  | -0.371433 |
| 25               | 6                | 0              | -0.156620               | 0.004722  | 0.530791  |
| 26               | 6                | 0              | -4.879022               | -1.956552 | 0.014691  |
| 27               | 6                | 0              | 4.917843                | -0.779335 | 0.326480  |
| 28               | 6                | 0              | 5.296510                | 0.150219  | 1.314198  |
| 29               | 6                | 0              | 6.610535                | 0.580570  | 1.434047  |
| 30               | 6                | 0              | 7.598086                | 0.090730  | 0.562787  |
| 31               | 6                | 0              | 7.235373                | -0.835776 | -0.426523 |
| 32               | 6                | 0              | 5.916196                | -1.260003 | -0.539154 |
| 33               | 6                | 0              | -5.527517               | -0.787051 | -0.419717 |
| 34               | 6                | 0              | -6.913503               | -0.680110 | -0.399457 |
| 35               | 6                | 0              | -7.698977               | -1.748609 | 0.058869  |
| 36               | 6                | 0              | -7.064380               | -2.923074 | 0.497119  |
| 37               | 6                | 0              | -5.680024               | -3.019783 | 0.473884  |
| 38               | 6                | 0              | 8.969908                | 0.553548  | 0.705891  |
| 39               | 7                | 0              | 9.455157                | 1.400926  | 1.567874  |
| 40               | 7                | 0              | 10.811441               | 1.513109  | 1.300733  |
| 41               | 6                | 0              | 11.062532               | 0.725770  | 0.292242  |
| 42               | 8                | 0              | 9.936471                | 0.080680  | -0.140635 |
| 43               | 6                | 0              | -9.151192               | -1.666775 | 0.089156  |
| 44               | 7                | 0              | -10.007751              | -2.564398 | 0.485609  |
| 45               | 7                | 0              | -11.270614              | -2.015462 | 0.318906  |
| 46               | 6                | 0              | -11.098916              | -0.818512 | -0.168805 |
| 47               | 8                | 0              | -9.773772               | -0.526431 | -0.342096 |
| 48               | 6                | 0              | 12.331255               | 0.481600  | -0.373812 |
| 49               | 6                | 0              | -12.103744              | 0.169610  | -0.525004 |
| 50               | 6                | 0              | 12.434577               | -0.399647 | -1.465518 |
| 51               | 6                | 0              | 13.656219               | -0.613359 | -2.083624 |
| 52               | 6                | 0              | 14.806916               | 0.048587  | -1.625486 |
| 53               | 6                | 0              | 14.714599               | 0.928965  | -0.537273 |
| 54               | 6                | 0              | 13.484305               | 1.138816  | 0.078353  |
| 55               | 6                | 0              | -11.749014              | 1.426120  | -1.048904 |

ESI: S. Oyston *et al.* «New 2,5-Diaryl-1,3,4-oxadiazole-fluorene...»

|    |   |   |            |           |           |
|----|---|---|------------|-----------|-----------|
| 56 | 6 | 0 | -12.726103 | 2.350467  | -1.381847 |
| 57 | 6 | 0 | -14.448238 | 0.792119  | -0.677408 |
| 58 | 6 | 0 | -13.461328 | -0.131316 | -0.345428 |
| 59 | 8 | 0 | 15.954825  | -0.230212 | -2.299748 |
| 60 | 6 | 0 | -14.083953 | 2.042317  | -1.199084 |
| 61 | 8 | 0 | -14.962346 | 3.017417  | -1.556405 |
| 62 | 6 | 0 | -16.352242 | 2.770910  | -1.393493 |
| 63 | 6 | 0 | 17.155881  | 0.406266  | -1.885638 |
| 64 | 1 | 0 | -3.391310  | -4.147271 | -0.579795 |
| 65 | 1 | 0 | -0.934249  | -4.365454 | -0.619396 |
| 66 | 1 | 0 | -3.051977  | -0.003259 | 0.551891  |
| 67 | 1 | 0 | 1.702365   | -4.050222 | -0.531556 |
| 68 | 1 | 0 | 4.030935   | -3.266258 | -0.306284 |
| 69 | 1 | 0 | 2.651574   | 0.692201  | 0.690832  |
| 70 | 1 | 0 | -0.342830  | 0.321536  | 5.293383  |
| 71 | 1 | 0 | -0.624315  | 2.776499  | 5.125281  |
| 72 | 1 | 0 | -0.685503  | 3.888657  | 2.905743  |
| 73 | 1 | 0 | -0.117814  | -1.064414 | 3.239957  |
| 74 | 1 | 0 | -0.685677  | 4.554181  | 0.367236  |
| 75 | 1 | 0 | -0.622008  | 4.674571  | -2.112467 |
| 76 | 1 | 0 | -0.339068  | 2.618240  | -3.463674 |
| 77 | 1 | 0 | -0.114469  | 0.402729  | -2.354171 |
| 78 | 1 | 0 | 4.552540   | 0.518997  | 2.014035  |
| 79 | 1 | 0 | 6.892990   | 1.290204  | 2.204731  |
| 80 | 1 | 0 | 7.986780   | -1.213770 | -1.112202 |
| 81 | 1 | 0 | 5.649177   | -1.955571 | -1.329253 |
| 82 | 1 | 0 | -4.938184  | 0.040091  | -0.804081 |
| 83 | 1 | 0 | -7.391630  | 0.229222  | -0.748880 |
| 84 | 1 | 0 | -7.671373  | -3.745528 | 0.861132  |
| 85 | 1 | 0 | -5.206259  | -3.924684 | 0.842754  |
| 86 | 1 | 0 | 11.550966  | -0.915613 | -1.826822 |
| 87 | 1 | 0 | 13.749251  | -1.290216 | -2.926778 |
| 88 | 1 | 0 | 15.588607  | 1.450751  | -0.165438 |
| 89 | 1 | 0 | 13.405759  | 1.818463  | 0.920626  |
| 90 | 1 | 0 | -10.702409 | 1.673443  | -1.193593 |
| 91 | 1 | 0 | -12.465744 | 3.323057  | -1.786789 |
| 92 | 1 | 0 | -15.489384 | 0.531295  | -0.527753 |
| 93 | 1 | 0 | -13.736086 | -1.100363 | 0.058301  |
| 94 | 1 | 0 | -16.856849 | 3.674929  | -1.738233 |
| 95 | 1 | 0 | -16.682845 | 1.916956  | -1.998517 |
| 96 | 1 | 0 | -16.607799 | 2.590695  | -0.341449 |
| 97 | 1 | 0 | 17.933973  | 0.037835  | -2.556113 |
| 98 | 1 | 0 | 17.084504  | 1.497739  | -1.976612 |
| 99 | 1 | 0 | 17.413286  | 0.144572  | -0.851290 |

---

**Table S4.** B3LYP/6-31G(d) optimised geometry of compound **16a**

E(RB+HF-LYP) = -2950.7243769 Hartree

Dipole moment (Debye): X= -0.0019 Y= 4.6058 Z= 0.0124 Tot= 4.6058

| Center<br>Number | Atomic<br>Number | Atomic<br>Type | Coordinates (Angstroms) |           |           |
|------------------|------------------|----------------|-------------------------|-----------|-----------|
|                  |                  |                | X                       | Y         | Z         |
| 1                | 6                | 0              | 3.480540                | 1.820133  | -0.198187 |
| 2                | 6                | 0              | 2.530897                | 0.773216  | -0.143577 |
| 3                | 6                | 0              | 1.179540                | 1.061682  | -0.068168 |
| 4                | 6                | 0              | 0.729424                | 2.401094  | -0.045197 |
| 5                | 6                | 0              | 1.650930                | 3.449081  | -0.099312 |
| 6                | 6                | 0              | 3.008404                | 3.149956  | -0.174591 |
| 7                | 6                | 0              | -0.729736               | 2.401046  | 0.038149  |
| 8                | 6                | 0              | -1.179473               | 1.061607  | 0.065991  |
| 9                | 6                | 0              | -2.530744               | 0.773034  | 0.142466  |
| 10               | 6                | 0              | -3.480699               | 1.819870  | 0.193128  |
| 11               | 6                | 0              | -3.008928               | 3.149734  | 0.164891  |
| 12               | 6                | 0              | -1.651534               | 3.448963  | 0.088548  |
| 13               | 6                | 0              | 0.000178                | 0.090170  | 0.000752  |
| 14               | 6                | 0              | 4.923226                | 1.595937  | -0.275371 |
| 15               | 6                | 0              | 5.566617                | 0.408339  | -0.305620 |
| 16               | 6                | 0              | -4.923336               | 1.595508  | 0.270844  |
| 17               | 6                | 0              | -5.566487               | 0.407802  | 0.302012  |
| 18               | 6                | 0              | -7.010362               | 0.188622  | 0.375437  |
| 19               | 6                | 0              | 7.010571                | 0.189452  | -0.378467 |
| 20               | 6                | 0              | -7.499080               | -1.131819 | 0.389637  |
| 21               | 6                | 0              | -8.859952               | -1.406101 | 0.454909  |
| 22               | 6                | 0              | -9.806599               | -0.369255 | 0.507870  |
| 23               | 6                | 0              | -9.321799               | 0.952999  | 0.495515  |
| 24               | 6                | 0              | -7.962945               | 1.226299  | 0.432326  |
| 25               | 6                | 0              | 7.963135                | 1.227372  | -0.431099 |
| 26               | 6                | 0              | 9.322048                | 0.954374  | -0.494227 |
| 27               | 6                | 0              | 9.806942                | -0.367801 | -0.510595 |
| 28               | 6                | 0              | 8.860338                | -1.404879 | -0.461627 |
| 29               | 6                | 0              | 7.499397                | -1.130905 | -0.396435 |
| 30               | 6                | 0              | -11.257889              | -0.654401 | 0.573058  |
| 31               | 6                | 0              | 11.258305               | -0.652601 | -0.575693 |
| 32               | 6                | 0              | 11.750927               | -1.765601 | -1.284467 |
| 33               | 6                | 0              | 13.110165               | -2.038275 | -1.346664 |
| 34               | 6                | 0              | 14.031058               | -1.198869 | -0.697111 |
| 35               | 6                | 0              | 13.555305               | -0.085741 | 0.012391  |
| 36               | 6                | 0              | 12.191687               | 0.178316  | 0.069654  |
| 37               | 6                | 0              | -12.191809              | 0.178523  | -0.068918 |
| 38               | 6                | 0              | -13.555349              | -0.085964 | -0.011706 |
| 39               | 6                | 0              | -14.030466              | -1.201575 | 0.694314  |
| 40               | 6                | 0              | -13.109037              | -2.042960 | 1.340539  |
| 41               | 6                | 0              | -11.749891              | -1.769822 | 1.278449  |
| 42               | 6                | 0              | -15.450968              | -1.505407 | 0.771523  |
| 43               | 7                | 0              | -16.036765              | -2.500151 | 1.374770  |
| 44               | 7                | 0              | -17.399174              | -2.353003 | 1.161137  |
| 45               | 6                | 0              | -17.552901              | -1.277193 | 0.440683  |
| 46               | 8                | 0              | -16.354429              | -0.683217 | 0.153367  |
| 47               | 6                | 0              | 15.451690               | -1.501990 | -0.774707 |
| 48               | 7                | 0              | 16.038247               | -2.493403 | -1.382683 |
| 49               | 7                | 0              | 17.400452               | -2.346964 | -1.167247 |
| 50               | 6                | 0              | 17.553305               | -1.274878 | -0.441079 |
| 51               | 8                | 0              | 16.354431               | -0.682783 | -0.151563 |
| 52               | 6                | 0              | 18.784858               | -0.685167 | 0.057341  |
| 53               | 6                | 0              | -18.785040              | -0.685272 | -0.053648 |
| 54               | 6                | 0              | 20.011121               | -1.295305 | -0.242345 |
| 55               | 6                | 0              | 21.208921               | -0.756255 | 0.217300  |
| 56               | 6                | 0              | 21.193987               | 0.413634  | 0.991245  |
| 57               | 6                | 0              | 19.969293               | 1.029574  | 1.296216  |
| 58               | 6                | 0              | 18.780504               | 0.487148  | 0.834964  |
| 59               | 6                | 0              | -20.010714              | -1.298449 | 0.242230  |

ESI: S. Oyston *et al.* «New 2,5-Diaryl-1,3,4-oxadiazole-fluorene...»

|     |   |   |            |           |           |
|-----|---|---|------------|-----------|-----------|
| 60  | 6 | 0 | -21.209088 | -0.757345 | -0.213480 |
| 61  | 6 | 0 | -21.195344 | 0.417753  | -0.979522 |
| 62  | 6 | 0 | -19.971250 | 1.036755  | -1.280667 |
| 63  | 6 | 0 | -18.781878 | 0.492236  | -0.823398 |
| 64  | 8 | 0 | 22.301794  | 1.025664  | 1.489386  |
| 65  | 8 | 0 | -22.303801 | 1.032164  | -1.473259 |
| 66  | 6 | 0 | -23.575492 | 0.462626  | -1.194581 |
| 67  | 6 | 0 | 23.574016  | 0.458764  | 1.207768  |
| 68  | 6 | 0 | -0.071126  | -0.825293 | -1.256402 |
| 69  | 6 | 0 | -0.145531  | -0.107116 | -2.607209 |
| 70  | 6 | 0 | 0.071651   | -0.820530 | 1.261358  |
| 71  | 6 | 0 | 0.146233   | -0.097246 | 2.609427  |
| 72  | 1 | 0 | 2.864641   | -0.260884 | -0.160445 |
| 73  | 1 | 0 | 1.321579   | 4.484874  | -0.082987 |
| 74  | 1 | 0 | 3.731718   | 3.960981  | -0.216285 |
| 75  | 1 | 0 | -2.864162  | -0.261096 | 0.163414  |
| 76  | 1 | 0 | -3.732468  | 3.960702  | 0.203650  |
| 77  | 1 | 0 | -1.322469  | 4.484782  | 0.068552  |
| 78  | 1 | 0 | 5.514652   | 2.509794  | -0.308942 |
| 79  | 1 | 0 | 4.978462   | -0.507465 | -0.271993 |
| 80  | 1 | 0 | -5.514946  | 2.509281  | 0.303511  |
| 81  | 1 | 0 | -4.978179  | -0.507893 | 0.268216  |
| 82  | 1 | 0 | -6.791862  | -1.956572 | 0.338202  |
| 83  | 1 | 0 | -9.195531  | -2.439071 | 0.434921  |
| 84  | 1 | 0 | -10.023888 | 1.779058  | 0.566015  |
| 85  | 1 | 0 | -7.637696  | 2.262359  | 0.436811  |
| 86  | 1 | 0 | 7.637850   | 2.263429  | -0.431979 |
| 87  | 1 | 0 | 10.024152  | 1.780704  | -0.561336 |
| 88  | 1 | 0 | 9.195998   | -2.437877 | -0.444732 |
| 89  | 1 | 0 | 6.792196   | -1.955865 | -0.348197 |
| 90  | 1 | 0 | 11.057200  | -2.409579 | -1.816724 |
| 91  | 1 | 0 | 13.478901  | -2.893557 | -1.903341 |
| 92  | 1 | 0 | 14.255355  | 0.564745  | 0.526648  |
| 93  | 1 | 0 | 11.841230  | 1.027965  | 0.648102  |
| 94  | 1 | 0 | -11.841847 | 1.030135  | -0.644774 |
| 95  | 1 | 0 | -14.255831 | 0.566080  | -0.523394 |
| 96  | 1 | 0 | -13.477288 | -2.900169 | 1.894565  |
| 97  | 1 | 0 | -11.055731 | -2.415415 | 1.808171  |
| 98  | 1 | 0 | 20.015585  | -2.199631 | -0.842074 |
| 99  | 1 | 0 | 22.141193  | -1.249926 | -0.030773 |
| 100 | 1 | 0 | 19.979567  | 1.933544  | 1.896574  |
| 101 | 1 | 0 | 17.839175  | 0.970552  | 1.075285  |
| 102 | 1 | 0 | -20.014264 | -2.206788 | 0.835871  |
| 103 | 1 | 0 | -22.140880 | -1.253483 | 0.031471  |
| 104 | 1 | 0 | -19.982441 | 1.944749  | -1.874905 |
| 105 | 1 | 0 | -17.841027 | 0.978056  | -1.060705 |
| 106 | 1 | 0 | -23.772225 | 0.428256  | -0.115380 |
| 107 | 1 | 0 | -23.663452 | -0.548799 | -1.611616 |
| 108 | 1 | 0 | -24.305605 | 1.116120  | -1.674758 |
| 109 | 1 | 0 | 23.771457  | 0.431605  | 0.128491  |
| 110 | 1 | 0 | 23.662359  | -0.555320 | 1.618219  |
| 111 | 1 | 0 | 24.303415  | 1.109554  | 1.692678  |
| 112 | 1 | 0 | -0.944485  | -1.482418 | -1.145179 |
| 113 | 1 | 0 | 0.807225   | -1.485110 | -1.242379 |
| 114 | 1 | 0 | 0.732572   | 0.525292  | -2.774324 |
| 115 | 1 | 0 | -1.035656  | 0.526819  | -2.676154 |
| 116 | 1 | 0 | -0.191413  | -0.837668 | -3.422715 |
| 117 | 1 | 0 | 0.944965   | -1.478110 | 1.152520  |
| 118 | 1 | 0 | -0.806732  | -1.480349 | 1.249944  |
| 119 | 1 | 0 | -0.732262  | 0.535117  | 2.774633  |
| 120 | 1 | 0 | 1.035916   | 0.537612  | 2.675514  |
| 121 | 1 | 0 | 0.193097   | -0.824707 | 3.427636  |

---

**Table S5.** B3LYP/6-31G(d) optimised geometry of compound **OXD-7**

E(RB+HF-LYP) = -1530.7162 316 Hartree

Dipole moment (Debye): X= -0.0225 Y= 6.5750 Z= 0.0004 Tot= 6.5751

| Center<br>Number | Atomic<br>Number | Atomic<br>Type | Coordinates (Angstroms) |           |           |
|------------------|------------------|----------------|-------------------------|-----------|-----------|
|                  |                  |                | X                       | Y         | Z         |
| 1                | 6                | 0              | 1.218743                | 1.699185  | -0.000150 |
| 2                | 6                | 0              | 1.216608                | 0.294627  | -0.000071 |
| 3                | 6                | 0              | 0.002135                | -0.402037 | -0.000021 |
| 4                | 6                | 0              | -1.207381               | 0.303170  | -0.000043 |
| 5                | 6                | 0              | -1.199709               | 1.707709  | -0.000123 |
| 6                | 6                | 0              | 0.011951                | 2.394882  | -0.000177 |
| 7                | 6                | 0              | -2.461890               | -0.440973 | 0.000029  |
| 8                | 6                | 0              | 2.465782                | -0.458421 | -0.000042 |
| 9                | 8                | 0              | -3.647698               | 0.239928  | -0.000058 |
| 10               | 6                | 0              | -4.574787               | -0.766323 | 0.000062  |
| 11               | 7                | 0              | -4.011812               | -1.941813 | 0.000212  |
| 12               | 7                | 0              | -2.641706               | -1.729759 | 0.000165  |
| 13               | 7                | 0              | 2.636307                | -1.748487 | -0.000017 |
| 14               | 7                | 0              | 4.004749                | -1.970559 | 0.000031  |
| 15               | 6                | 0              | 4.576328                | -0.799253 | -0.000029 |
| 16               | 8                | 0              | 3.656525                | 0.213798  | -0.000064 |
| 17               | 6                | 0              | 5.996961                | -0.481801 | -0.000027 |
| 18               | 6                | 0              | -5.993189               | -0.439594 | 0.000038  |
| 19               | 6                | 0              | -6.940626               | -1.477080 | 0.000342  |
| 20               | 6                | 0              | -8.296262               | -1.181239 | 0.000327  |
| 21               | 6                | 0              | -8.768902               | 0.145293  | 0.000012  |
| 22               | 6                | 0              | -7.808634               | 1.166467  | -0.000294 |
| 23               | 6                | 0              | -6.442762               | 0.885795  | -0.000281 |
| 24               | 6                | 0              | 6.454524                | 0.844532  | -0.000075 |
| 25               | 6                | 0              | 7.818269                | 1.112523  | -0.000065 |
| 26               | 6                | 0              | 8.777258                | 0.083791  | -0.000008 |
| 27               | 6                | 0              | 8.299668                | -1.236108 | 0.000034  |
| 28               | 6                | 0              | 6.937011                | -1.521128 | 0.000028  |
| 29               | 6                | 0              | -10.282492              | 0.419229  | 0.000036  |
| 30               | 6                | 0              | -10.917143              | -0.211273 | 1.263020  |
| 31               | 6                | 0              | -10.607384              | 1.924993  | -0.000397 |
| 32               | 6                | 0              | -10.917361              | -0.212028 | -1.262458 |
| 33               | 6                | 0              | 10.276365               | 0.430869  | 0.000003  |
| 34               | 6                | 0              | 10.610344               | 1.261286  | 1.262608  |
| 35               | 6                | 0              | 11.169214               | -0.824340 | 0.000007  |
| 36               | 6                | 0              | 10.610371               | 1.261289  | -1.262591 |
| 37               | 1                | 0              | 2.161108                | 2.236537  | -0.000189 |
| 38               | 1                | 0              | -0.001698               | -1.486388 | 0.000040  |
| 39               | 1                | 0              | -2.138303               | 2.251614  | -0.000140 |
| 40               | 1                | 0              | 0.015783                | 3.480903  | -0.000237 |
| 41               | 1                | 0              | -6.597515               | -2.506587 | 0.000589  |
| 42               | 1                | 0              | -9.003986               | -2.005122 | 0.000575  |
| 43               | 1                | 0              | -8.117616               | 2.205532  | -0.000553 |
| 44               | 1                | 0              | -5.725281               | 1.700281  | -0.000520 |
| 45               | 1                | 0              | 5.741356                | 1.662749  | -0.000119 |
| 46               | 1                | 0              | 8.139675                | 2.150058  | -0.000103 |
| 47               | 1                | 0              | 8.994970                | -2.067483 | 0.000074  |
| 48               | 1                | 0              | 6.588966                | -2.549028 | 0.000066  |
| 49               | 1                | 0              | -11.999260              | -0.033546 | 1.272680  |
| 50               | 1                | 0              | -10.757458              | -1.293671 | 1.304489  |
| 51               | 1                | 0              | -10.493187              | 0.224238  | 2.174966  |
| 52               | 1                | 0              | -11.693771              | 2.066874  | -0.000412 |
| 53               | 1                | 0              | -10.209768              | 2.429843  | 0.887463  |
| 54               | 1                | 0              | -10.209805              | 2.429316  | -0.888573 |
| 55               | 1                | 0              | -11.999472              | -0.034262 | -1.272050 |

ESI: S. Oyston *et al.* «New 2,5-Diaryl-1,3,4-oxadiazole-fluorene...»

|    |   |   |            |           |           |
|----|---|---|------------|-----------|-----------|
| 56 | 1 | 0 | -10.493536 | 0.222901  | -2.174743 |
| 57 | 1 | 0 | -10.757738 | -1.294460 | -1.303294 |
| 58 | 1 | 0 | 11.675514  | 1.522306  | 1.274421  |
| 59 | 1 | 0 | 10.038891  | 2.194513  | 1.301365  |
| 60 | 1 | 0 | 10.389147  | 0.695471  | 2.174717  |
| 61 | 1 | 0 | 12.223416  | -0.525960 | 0.000015  |
| 62 | 1 | 0 | 11.002234  | -1.444335 | 0.888022  |
| 63 | 1 | 0 | 11.002243  | -1.444330 | -0.888013 |
| 64 | 1 | 0 | 11.675539  | 1.522320  | -1.274370 |
| 65 | 1 | 0 | 10.389208  | 0.695473  | -2.174708 |
| 66 | 1 | 0 | 10.038914  | 2.194513  | -1.301368 |

---
